# Supplementary material for: Enhancing saturable absorption in a Au-decorated MoS2/PEDOT:PSS nanocomposite through plasmon resonance and Pauli blocking
Source: Royal Society of Chemistry journal article supplement (doi:10.1039/d3cp06153a), 2024-01-01
Supplement: d3cp06153a1.pdf [file d3cp06153a1.pdf]

## Enhancing Saturable Absorption in Au-Decorated MoS<sub>2</sub>/PEDOT:PSS Nanocomposite through Plasmon Resonance and Pauli Blocking

Arjun K<sup>a</sup>, Amaljith C K<sup>b</sup>, Karthikeyan B<sup>a\*</sup>

<sup>a</sup>Nanophotonics Laboratory, Department of Physics, National Institute of Technology,  
Thiruchirappalli-620 015, India. <sup>b</sup> Department of electro optics engineering, Ben Gurion  
University of the Negev, Israel.

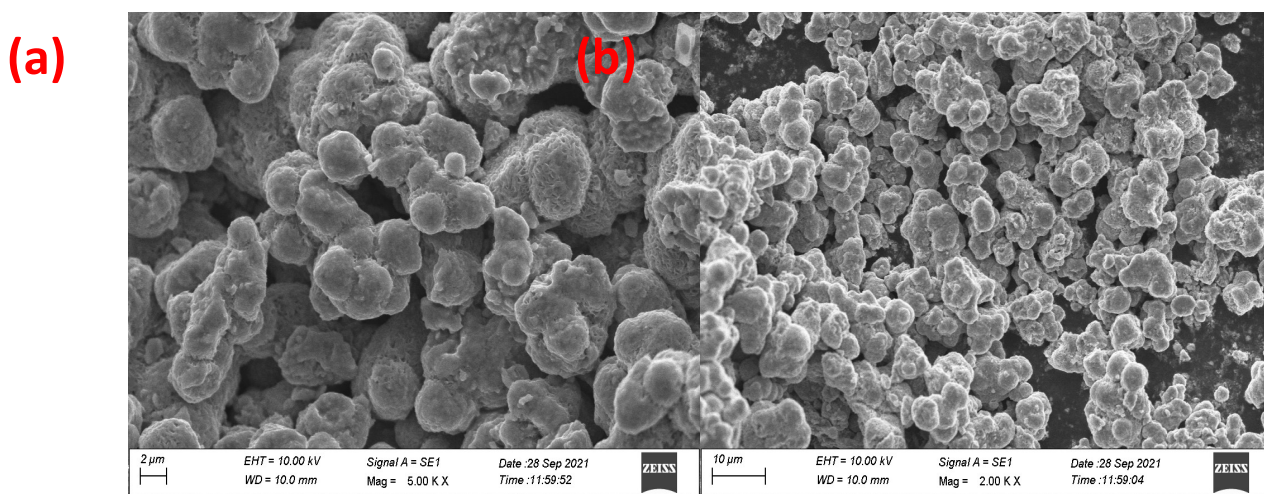

**Fig S1 (a and b) SEM images of pure MoS<sub>2</sub>**

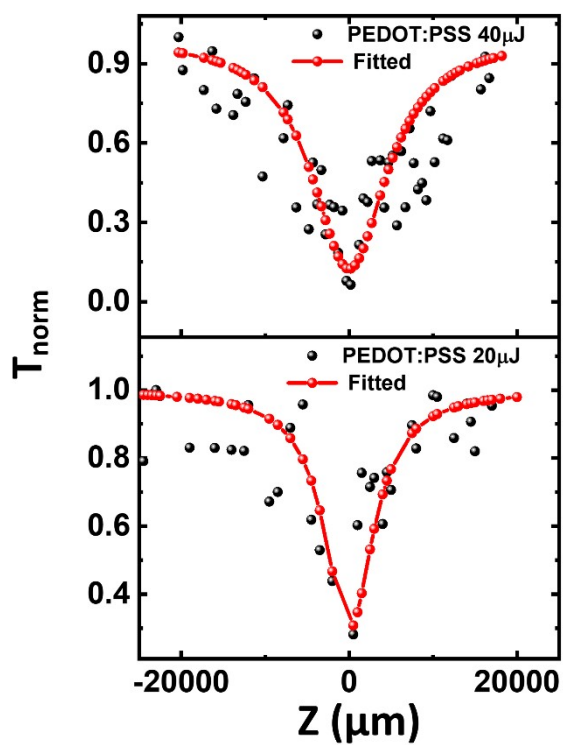

**Fig S2** Sample position-dependent optical transmittance of PEDOT:PSS films calculated from the open aperture  $Z$ -scan With varying input pulse energies (20 and 40  $\mu\text{J}$ )
